# Supplementary material
Source: Springer Nature journal article supplement (https://www.springermedizin.de/resource/supplementary/13054_2010_9447_MOESM4_ESM.pdf/9706152)

A

CM

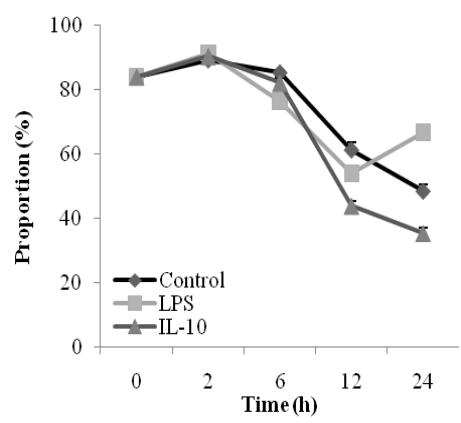

IM

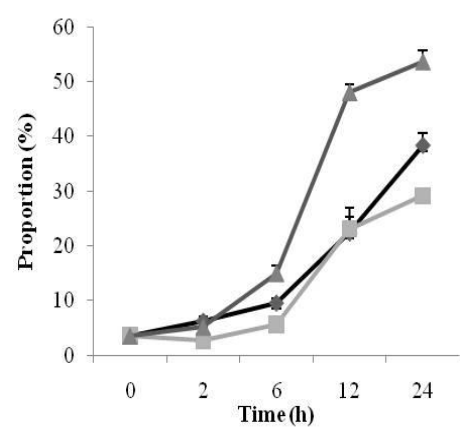

DM

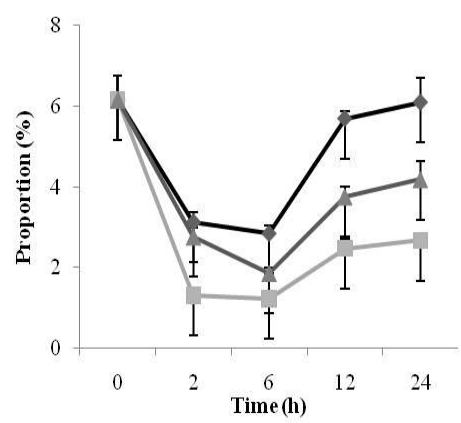

B

CM

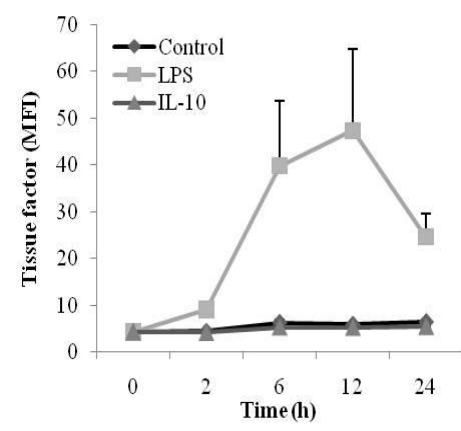

IM

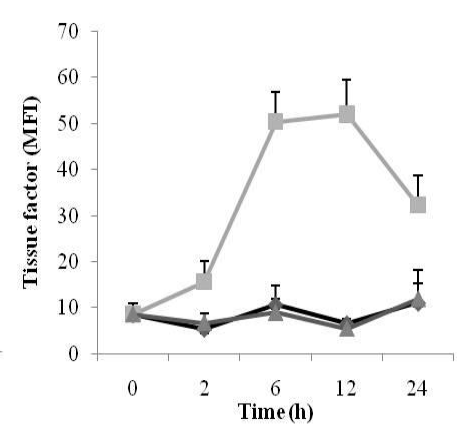

DM

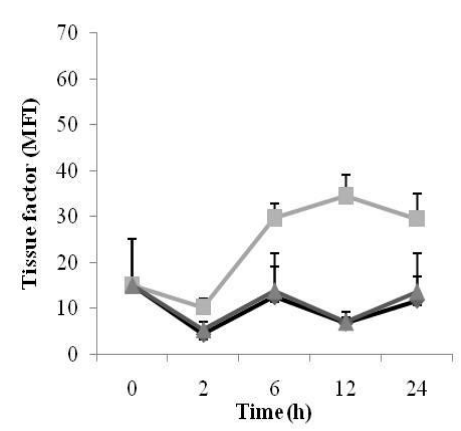

C

CM

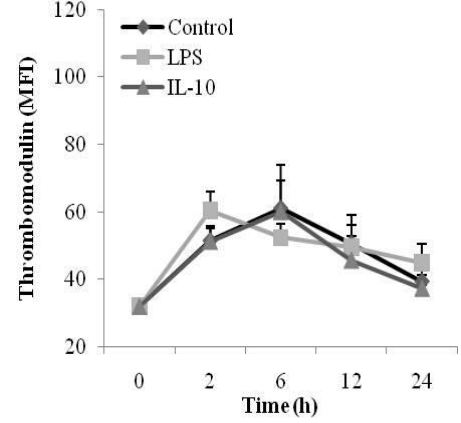

IM

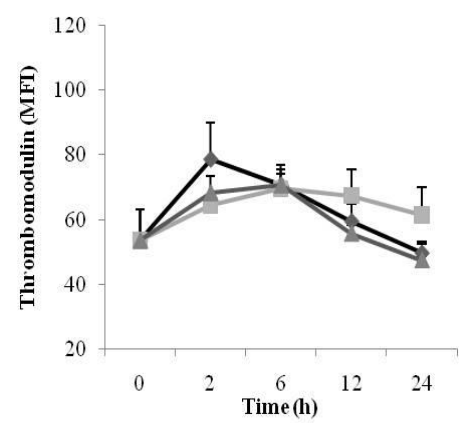

DM

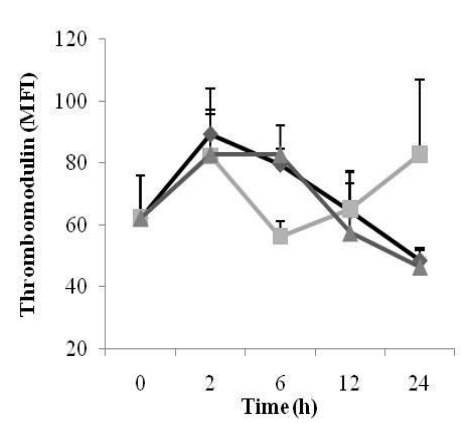

Supplement: MOESM4 [file 9706152]
